# Supplementary material
Source: HighWire-hosted journal article supplement (https://cmajopen.ca/highwire/filestream/90417/field_highwire_adjunct_files/0/open-2022-0224-original-submission.pdf)
Supplement: open-2022-0224-original-submission.pdf [file open-2022-0224-original-submission.pdf]

## Appraising resources to support patients considering decisions about Medical Assistance in Dying in Canada: An online environmental scan

### Abstract

**Background:** Medical Assistance in Dying (MAID) was legalized in Canada in 2016 with legislation updated in 2021. Patients contemplating MAID must make this decision without coercion or external influence. It is unclear whether specific resources are available to help patients make this difficult decision. We sought to identify and quality appraise Canadian MAID resources suitable for supporting patients making this decision.

**Methods:** Environmental scan of MAID resources using Canadian websites. Inclusion criteria: published after 2016 initial MAID legislation, MAID-focused, patient-targeted, publicly accessible, and able to inform decisions about MAID in Canada. Exclusion criteria: resources targeting healthcare professionals and policymakers, service protocols, and personal narratives. Two reviewers appraised resources using the International Patient Decision Aids Standards (IPDAS) criteria and the Patient Education Materials Assessment Tool (PEMAT). Descriptive analysis was conducted. Resources were patient decision aids if 7 IPDAS defining criteria were met and adequate for health literacy if  $\geq 70\%$  on PEMAT.

**Results:** Fifty-eight MAID resources were identified. Of 58 resources, 41 (71%) provided updated eligibility criteria updated with 2021 legislation and 4 did not discuss eligibility criteria. The median IPDAS score was 3 out of 7; none provided benefits or potential harms of options. The proportion of resources with adequate PEMAT understandability score was 52%, and adequate PEMAT actionability score was 19%.

1  
2  
3 **Interpretations:** Although many resources on MAID were updated with 2021 legislation, few  
4  
5 were adequate to support patients with lower health literacy. There is a need to determine if a  
6  
7 patient decision aid would be appropriate for patients contemplating MAID.  
8  
9

10 **Keywords:** medical assistance in dying, end of life, patient decision aids, IPDAS, PEMAT  
11  
12  
13  
14  
15  
16  
17  
18  
19  
20  
21  
22  
23  
24  
25  
26  
27  
28  
29  
30  
31  
32  
33  
34  
35  
36  
37  
38  
39  
40  
41  
42  
43  
44  
45  
46  
47  
48  
49  
50  
51  
52  
53  
54  
55  
56  
57  
58  
59  
60

Confidential

## Introduction

In June 2016, Canada legalized Medical Assistance in Dying (MAID; Bill C-14) which allowed the safe and intentional end of life of patients suffering from grievous, incurable diseases, whose death is reasonably foreseeable.<sup>1</sup> MAID involves the administration of medications to safely and intentionally end the life of an adult who is eligible for MAID and specifically requested it.<sup>1</sup> In March 2021, an amendment to the legislation (Bill C-7) broadened the eligibility criteria for MAID to include patients whose death is not reasonably foreseeable, but this requires a 90-day waiting period.<sup>2</sup> The new regulation aimed to assist healthcare professionals to carry out MAID, while protecting patients from abuse or misuse.<sup>1</sup>

Although patients requesting MAID are supposed to receive information about all options available to them, as per the legislation,<sup>1</sup> it is unclear the extent to which patients actively making the decision about MAID are supported in considering alternative end-of-life care options.<sup>3</sup> When making a decision with multiple options requiring trade-offs among benefits and potential harms, patients are likely to experience decisional conflict, a state described as uncertainty about the best course of action.<sup>4,5</sup> End of life decisions, including MAID, were identified in a recent Canadian survey of difficult decisions during the first year of the pandemic that is currently under review.<sup>5</sup>

Patient decision aids are evidence-based resources proven to reduce decisional conflict, improve knowledge, and support patients to participate in decisions.<sup>6</sup> As compared to those who did not use a decision aid, patients with lower health literacy and socio-economic status who used a decision aid had higher gains in knowledge, informed choice, participation in decision making, decision self-efficacy, preference for shared decision-making, and reduced decisional

1  
2  
3 conflict.<sup>7</sup> At a minimum, patient decision aids make explicit the decision, provide information on  
4 options (including benefits, harms), and help clarify values for outcomes of options.<sup>7</sup>  
5  
6

7  
8 Although there are many Canadian MAID resources available for patients, it is not clear  
9 the extent to which they use effective approaches to support decision making and whether they  
10 are adequate for people with lower health literacy. Further, it is not clear if they can be identified  
11 as patient decision aids, the gold standard of decision support tools, to ensure informed values  
12 congruent decisions.<sup>8</sup> Therefore, we sought to identify Canadian MAID resources for patients  
13 and appraise their quality.  
14  
15  
16  
17  
18  
19  
20  
21

## 22 **METHODS**

### 23 **Study design**

24  
25 We conducted an environmental scan by seeking, gathering, and interpreting information to  
26 inform decision-making.<sup>9-11</sup> The interpretation was informed by quality appraisal. As there are  
27 no specific guidelines used to report environmental scans, we adapted the PRISMA reporting  
28 guidelines to write this article.<sup>12</sup>  
29  
30  
31  
32  
33  
34  
35

### 36 **Search strategy**

37  
38 We conducted the environmental scan using Google searches and hand searching  
39 Canadian government and organization websites. We limited the search to Canadian websites  
40 given that the resources identified would also need to reflect the Canadian MAID legislation.<sup>1</sup>  
41 One person (AK) conducted the searches using popular searched keywords according to the  
42 Google Trend. Key search terms, used independently, were: medical assistance in dying, assisted  
43 suicide, voluntary euthanasia, MAID and dying, and physician assisted suicide.  
44  
45  
46  
47  
48  
49  
50  
51

52 We conducted the searches in new private window in the internet browser Safari to  
53 prevent caching of results from previous searches.<sup>13</sup> We discontinued the searches when no new  
54  
55  
56  
57  
58  
59  
60

1  
2  
3 resources were identified within the next 50 internet hits. We searched the Canadian federal,  
4 provincial, and territorial governments websites, as well as relevant Canadian organizations'  
5 websites (i.e., Dying with Dignity, Canadian MAID Assessors and Providers) using the same  
6 search terms. Additionally, we reviewed Google Advanced Search using the same keywords.  
7  
8  
9  
10  
11

### 12 **Eligibility of resources**

13  
14 All identified MAID resources were reviewed against our eligibility criteria. Eligible  
15 resources were published after the 2016 MAID legislation, MAID-focused, able to inform  
16 decisions about MAID, patient-targeted, and publicly accessible. To determine whether the  
17 resource could inform decisions, it had to provide information on MAID as an end-of-life option,  
18 including details about the procedure. We excluded resources if they were: exclusively targeted  
19 to healthcare providers or policymakers, personal narratives (i.e., personal websites, blogs,  
20 public forums), or healthcare service protocols (i.e., request forms, instructions for completion of  
21 healthcare providers roles). We documented non-eligible MAID resources with reasons for  
22 exclusion.  
23  
24  
25  
26  
27  
28  
29  
30  
31  
32  
33  
34

### 35 **Data extraction**

36  
37 We extracted information on eligible resources using a standardized data extraction  
38 spreadsheet in Excel Version 16.48 (Microsoft, Redmond, WA). One researcher (AK) extracted  
39 the data, and it was verified by others (DS, LBP). The following were collected: resource title,  
40 target audience, author/developer, year of last update, languages in which the resource is  
41 available, URL, pathway to the resource, and dates accessed.  
42  
43  
44  
45  
46  
47  
48

### 49 **Quality appraisal**

50  
51 Two reviewers (AK, LPB) independently appraised the eligible resources. Discrepancies  
52 were resolved through consensus or consultation with an arbitrator (DS) as necessary.  
53  
54  
55  
56  
57  
58  
59  
60

1  
2  
3 Accuracy of MAID information on eligibility criteria was compared to the 2021 Bill C-7: *An*  
4 *Act to amend the Criminal Code (MAID)* at 5 months and 13 months after legislation passed  
5  
6 (Table 1). We scored it as yes (updated), no (not updated), or not applicable if eligibility was not  
7  
8 discussed.  
9  
10

11  
12 We used the 6 IPDAS defining criteria to determine whether the resource qualified as a  
13  
14 patient decision aid.<sup>14</sup> We included a 7th criteria of ‘target audience’ as proposed by Martin et al.  
15  
16 (2021) (Table 2).<sup>15</sup> We scored the IPDAS criteria as present (yes) or absent (no).  
17  
18

19 To assess health literacy, we used the Patient Education Material Assessment Tool for  
20  
21 Printable Materials (PEMAT-P) or Audiovisual Materials (PEMAT-AV). The PEMAT assesses  
22  
23 resources on two domains: (a) understandability (PEMAT-P includes 17 items; PEMAT-AV  
24  
25 includes 13 items) and (b) actionability (PEMAT-P 7 includes items, PEMAT-AV includes 4  
26  
27 items).<sup>16</sup> We scored the items as 0 (disagree), 1 (agree), or N/A (not applicable) according to the  
28  
29 PEMAT User’s Guide.<sup>16,17</sup> PEMAT scores were calculated as percentages of total possible points  
30  
31 (excluding not applicable).<sup>16</sup> According to the PEMAT, materials are considered understandable  
32  
33 when consumers of diverse backgrounds and varying levels of health literacy can process and  
34  
35 explain the key messages and resources are actionable when consumers of diverse backgrounds  
36  
37 and varying levels of health literacy can identify what to do based on the information provided.  
38  
39  
40 The PEMAT individual scores were standardized on a scale out of 100.  
41  
42  
43

#### 44 **Data analysis**

45  
46 We used descriptive statistics to report characteristics of the resources. As data was not  
47  
48 normally distributed, we analyzed findings using median, interquartile range (IQR), and range.  
49  
50 Resources had to meet all 7 criteria to be defined as a patient decision aid.<sup>8</sup> An overall score of  
51  
52  $\geq 70\%$  indicated the resource was adequate for being understandable or actionable.<sup>16</sup>  
53  
54  
55  
56  
57  
58  
59  
60

## RESULTS

### Main characteristics of resources

Of 530 Google results searched in August 2021, 58 were included and analyzed (Figure 1). Google Trend indicated that MAID was a common topic in Canadian Healthcare in 2020 to 2021 as evidenced by the number of search hits (Figures 2, 3). Resources were available in French and/or English, and one resource was available in English, Chinese Traditional, Chinese Simplified, Punjabi, Spanish, and Vietnamese. Developers varied, with 3 developed by the federal government, 10 by national organizations, 41 by provinces and 4 by the Canadian Territories (Table 1). Fifty-three resources were in print and five were videos. None were available in both formats.

### Quality appraisal of resources

By five months after Bill C-7 was passed, 37 of 54 (68.5%) were updated with eligibility criteria that reflected the new legislation and 4 did not discuss eligibility criteria for MAID. Thirteen months after Bill C-7 was passed, 41 of 54 (75.9%) of resources discussing eligibility criteria had been updated.

None of the 58 eligible resources met the criteria to be defined as patient decision aids (Table 2). The median number of IPDAS defining criteria was 3 out of 7 (IQR 2, range 0-5) (Figure 4). Of 58 resources, more common IPDAS criteria met were: information on the target audience (n=49; 84.5%), describes the health condition (n=45; 77.6%); and states the decision to be made (n=34; 58.6%). Although 18 out of 58 (31.0%) resources provided options, none provided information on the potential benefits or potential harms of the options.

The median PEMAT understandability score was 70.0% (IQR 20, range 47-100) (Table 2; Figure 5). Of 58 resources, 30 (51.7%) achieved an adequate understandability rating of

1  
2  
3  $\geq 70\%$ . The applicable PEMAT understandability items met by most resources were: does not  
4 expect the user to perform calculations (52 of 53; 98.1%), breaks down information into short  
5 sections (53 of 56; 94.6%), uses visual cues to draw attention to key points (48 of 55; 87.3%),  
6 and presents information in a logical sequence (47 of 58; 81.0%). PEMAT understandability  
7 items met by few resources were: provides a summary (8 of 47; 17.0%), visual aids reinforce  
8 rather than distract from the content (1 of 15; 6.7%), and visual aids have clear titles or captions  
9 (1 of 14; 7.1%).

10  
11  
12  
13  
14  
15  
16  
17  
18  
19  
20  
21  
22  
23  
24  
25  
26  
27  
28  
29  
30  
31  
32  
33  
34  
35  
36  
37  
38  
39  
40  
41  
42  
43  
44  
45  
46  
47  
48  
49  
50  
51  
52  
53  
54  
55  
56  
57  
58  
59  
60

The median PEMAT actionability score was 60.0% (IQR 25, range 0-86). Of 58 resources, 11 (19.0%) achieved an adequate actionability rating of  $\geq 70\%$ . Appropriate PEMAT actionability items mostly met were: clearly identifies at least one action the user can take (45 of 58; 77.6%), uses visual aids to make it easier to act on instructions (41 of 53; 77.4%), and addresses the user directly when describing actions (37 of 58; 63.8%). PEMAT actionability items rarely met were: explains how to use the charts, graphs, tables, or diagrams to take actions (1 of 3; 33.3%), breaks down the action into manageable, explicit steps (15 of 58; 25.9%), and provides a tangible tool whenever it could help the user take actions (2 of 53; 3.8%). For example, one resource that expected the user to perform calculations did not provide simple instructions for how to perform the calculation.

## INTERPRETATION

Of 58 publicly available resources on MAID in Canada, most reported on 2021 updated eligibility criteria according to Bill C-7 and none were patient decision aids. According to the PEMAT, approximately half of the resources were understandable and few were actionable. These findings lead to the following discussion points.



1  
2  
3 First, many MAID resources were updated at five and thirteen months after the new 2021  
4 Bill C-7 legislation expanded those who were eligible for MAID.<sup>1</sup> This is reassuring given the  
5 increased complexity with this revised legislation and challenges with ensuring educational  
6 resources are up-to-date as new evidence emerges.<sup>18</sup> If publicly available MAID resources are  
7 outdated, newly eligible individuals may be deterred from seeking more information about  
8 MAID or may seek access to MAID based on unrealistic expectations. With the finality and legal  
9 aspects of MAID, it is essential that MAID resources for patients are continually updated as  
10 legislation changes.<sup>19,20</sup>

21 Second, most MAID resources for patients were produced by governments and  
22 organizations. Nevertheless, none of the 58 resources met the IPDAS criteria to be defined as a  
23 patient decision aid; the gold standard for achieving informed values-congruent decisions.<sup>8</sup> Our  
24 findings revealed that the least met IPDAS defining criteria were a description of the options  
25 including the potential benefits and harms, and explicit guidance for clarifying values. Few  
26 resources listed alternative options, despite there being other treatments that could be considered  
27 for relieving or easing unbearable suffering apart from MAID, including palliative care,  
28 counselling services, mental health care, disability support services, and community services.<sup>2</sup>  
29 Previous studies reported that patients who used patient decision aids for end of life decisions  
30 about their goals of care, often experienced less decisional conflict and were more comfortable  
31 discussing the decision.<sup>21-23</sup> However, our findings cause us to reflect on the unusual nature of  
32 patient decision aids for people considering MAID. Some health providers and allied healthcare  
33 staff are uneasy with supporting decision-making in which one of the options presented involves  
34 death of the patient. In a pilot project to obtain feedback on a draft patient decision aid developed  
35 to guide pastoral workers providing nondirective discussion of end-of-life care options, some  
36  
37  
38  
39  
40  
41  
42  
43  
44  
45  
46  
47  
48  
49  
50  
51  
52  
53  
54  
55  
56  
57  
58  
59  
60

1  
2  
3 pastoral workers were reluctant to consider using it as they were morally and religiously against  
4  
5 MAID (Louisa Blair, DPTTh, e-mail correspondence).  
6

7  
8 Lastly, there is a need to improve both the understandability and actionability of MAID  
9  
10 patient education resources. Strategies for improving understandability include providing a  
11  
12 summary of key points, presenting resources in an active voice, and using visual images or  
13  
14 diagrams.<sup>16,24,25</sup> Actionability of decision support resources may be improved by breaking down  
15  
16 actions into manageable steps and providing a tangible tool to help the user take action.<sup>16,26</sup>  
17  
18 Tools, such as checklists, improve understanding and recall when provided in decision support  
19  
20 resources.<sup>24</sup> Many patient decision aids are structured in a series of steps to guide the process of  
21  
22 deliberating and communicating with others.<sup>27</sup>  
23  
24  
25

26  
27 Our environmental scan has strengths and limitations to consider when interpreting the  
28  
29 findings. The search strategy was comprehensive for Canadian federal, provincial, and territorial  
30  
31 governments, as well as relevant Canadian organizations' websites. However, given the changing  
32  
33 nature of websites, it is possible that previously published resources may no longer be available  
34  
35 or be moved to different webpages making them harder to locate. Another strength was that the  
36  
37 appraisal of resources using IPDAS and PEMAT was done independently by two authors.  
38  
39 Finally, given the search was done in English and once an English resource was identified we  
40  
41 looked for its availability in other languages, it is possible that we missed some non-English  
42  
43 resources.  
44  
45

46  
47 Our environmental scan identified and quality appraised 58 Canadian resources about  
48  
49 MAID for patients, of which most accurately reflect the 2021 legislation on eligibility criteria  
50  
51 and none were patient decision aids. Only about half met the adequate PEMAT health literacy  
52  
53 scores for understandability and few for actionability. Therefore, current MAID resources are  
54  
55  
56  
57  
58  
59  
60

1  
2  
3 more limited for guiding decision making or for supporting Canadians. The quality of MAID  
4  
5 resources for patients should be improved so that Canadians can understand the MAID process  
6  
7 and make a values-based, informed decision. Given the difficult and preference-sensitive nature  
8  
9 of MAID decisions, future research should also investigate if a patient decision aid could support  
10  
11 people considering MAID decisions.  
12  
13  
14  
15  
16  
17  
18  
19  
20  
21  
22  
23  
24  
25  
26  
27  
28  
29  
30  
31  
32  
33  
34  
35  
36  
37  
38  
39  
40  
41  
42  
43  
44  
45  
46  
47  
48  
49  
50  
51  
52  
53  
54  
55  
56  
57  
58  
59  
60

Confidential

## References

1. Government of Canada. Medical assistance in dying - Canada. ca. Published 2021. Accessed May 28, 2021. <https://www.canada.ca/en/health-canada/services/medical-assistance-dying.html>
2. Government of Canada. Canada's new medical assistance in dying (MAiD) law. Published 2021. Accessed July 8, 2021. <https://www.justice.gc.ca/eng/cj-jp/ad-am/bk-di.html>
3. Oczkowski SJW, Crawshaw DE, Austin P, et al. How can we improve the experiences of patients and families who request medical assistance in dying? A multi-centre qualitative study. *BMC Palliat Care*. 2021;20(1):185. doi:10.1186/s12904-021-00882-4
4. O'Connor AM. Validation of a Decisional Conflict Scale. *Med Decis Mak*. 1995;15(1):25-30. doi:10.1177/0272989X9501500105
5. Stacey D, Ludwig C, Archambault P, et al. Decisions and decision making needs of Canadians during the COVID-19 pandemic: A national survey. Published online 2022.
6. Stacey D, Légaré F, Lewis K, et al. Decision aids for people facing health treatment or screening decisions. *Cochrane Database Syst Rev*. Published online April 12, 2017. doi:10.1002/14651858.CD001431.pub5
7. Durand MA, Carpenter L, Dolan H, et al. Do interventions designed to support shared decision-making reduce health inequalities? A systematic review and meta-analysis. *PLoS One*. 2014;9(4). doi:10.1371/journal.pone.0094670
8. Stacey D, Volk RJ. The International Patient Decision Aid Standards (IPDAS) Collaboration: Evidence Update 2.0. *Med Decis Mak*. 2021;41(7):729-733. doi:10.1177/0272989X211035681

- 1  
2  
3 9. Charlton P, Doucet S, Azar R, et al. The use of the environmental scan in health services  
4 delivery research: a scoping review protocol. *BMJ Open*. 2019;9(9):e029805.  
5  
6 doi:10.1136/bmjopen-2019-029805  
7  
8
- 9  
10 10. Graham P, Evitts T, Thomas-MacLean R. Environmental scans: how useful are they for  
11 primary care research? *Can Fam Physician*. 2008;54(7):1022-1023.  
12  
13 <http://www.ncbi.nlm.nih.gov/pubmed/18625830>  
14  
15
- 16  
17 11. Hatch TF, Pearson TG. Using environmental scans in educational needs assessment. *J*  
18 *Contin Educ Health Prof*. 1998;18(3):179-184. doi:10.1002/chp.1340180308  
19  
20
- 21 12. Page MJ, McKenzie JE, Bossuyt PM, et al. The PRISMA 2020 statement: an updated  
22 guideline for reporting systematic reviews. *BMJ*. 2021;372:n71. doi:10.1136/bmj.n71  
23  
24
- 25 13. Maddah-Ali MA, Niesen U. Fundamental Limits of Caching. *IEEE Trans Inf Theory*.  
26 2014;60(5):2856-2867. doi:10.1109/TIT.2014.2306938  
27  
28
- 29 14. Joseph-Williams N, Newcombe R, Politi M, et al. Toward minimum standards for  
30 certifying patient decision aids: A modified delphi consensus process. *Med Decis Mak*.  
31 2014;34(6):699-710. doi:10.1177/0272989X13501721  
32  
33
- 34 15. Martin RW, Brogård Andersen S, O'Brien MA, et al. Providing Balanced Information  
35 about Options in Patient Decision Aids: An Update from the International Patient  
36 Decision Aid Standards. *Med Decis Mak*. 2021;41(7):780-800.  
37  
38 doi:10.1177/0272989X211021397  
39  
40
- 41 16. Shoemaker SJ, Wolf MS, Brach C. Development of the Patient Education Materials  
42 Assessment Tool (PEMAT): A new measure of understandability and actionability for  
43 print and audiovisual patient information. *Patient Educ Couns*. 2014;96(3):395-403.  
44  
45  
46  
47  
48  
49  
50  
51  
52  
53  
54  
55  
56  
57  
58  
59  
60

- 1  
2  
3 17. Vishnevetsky J, Walters CB, Tan KS. Interrater reliability of the Patient Education  
4 Materials Assessment Tool (PEMAT). *Patient Educ Couns*. 2018;101(3):490-496.  
5  
6 doi:10.1016/j.pec.2017.09.003  
7
- 8  
9  
10 18. Stacey D, Suwalska V, Boland L, Lewis KB, Presseau J, Thomson R. Are Patient  
11 Decision Aids Used in Clinical Practice after Rigorous Evaluation? A Survey of Trial  
12 Authors. *Med Decis Mak*. 2019;39(7):805-815. doi:10.1177/0272989X19868193  
13  
14
- 15 19. Coulter A, Entwistle V, Gilbert D. Sharing decisions with patients: is the information  
16 good enough? *BMJ*. 1999;318(7179):318-322. doi:10.1136/bmj.318.7179.318  
17  
18
- 19 20. Pellisé F, Sell P. Patient information and education with modern media: the Spine Society  
20 of Europe Patient Line. *Eur Spine J*. 2009;18(S3):395-401. doi:10.1007/s00586-009-0973-  
21  
22 1  
23  
24  
25  
26  
27
- 28 21. El-Jawahri A, Podgurski LM, Eichler AF, et al. Use of Video to Facilitate End-of-Life  
29 Discussions With Patients With Cancer: A Randomized Controlled Trial. *J Clin Oncol*.  
30  
31 2010;28(2):305-310. doi:10.1200/JCO.2009.24.7502  
32  
33  
34
- 35 22. Stein RA, Sharpe L, Bell ML, Boyle FM, Dunn SM, Clarke SJ. Randomized Controlled  
36 Trial of a Structured Intervention to Facilitate End-of-Life Decision Making in Patients  
37 With Advanced Cancer. *J Clin Oncol*. 2013;31(27):3403-3410.  
38  
39 doi:10.1200/JCO.2011.40.8872  
40  
41  
42  
43
- 44 23. Yun YH, Lee MK, Park S, et al. Use of a Decision Aid to Help Caregivers Discuss  
45 Terminal Disease Status With a Family Member With Cancer: A Randomized Controlled  
46  
47 Trial. *J Clin Oncol*. 2011;29(36):4811-4819. doi:10.1200/JCO.2011.35.3870  
48  
49  
50
- 51 24. Yiu A, Ng KK, Lee VW, Bajorek B V. Evaluating the Understandability and Actionability  
52 of Web-Based Education Materials for Patients Taking Non-vitamin K Oral  
53  
54  
55  
56  
57  
58  
59  
60

- 1  
2  
3 Anticoagulants. *Ther Innov Regul Sci.* 2020;54(2):476-483. doi:10.1007/s43441-019-  
4 00079-1  
5  
6  
7  
8 25. Fajardo MA, Balthazaar G, Zalums A, Trevena L, Bonner C. Favourable  
9 understandability, but poor actionability: An evaluation of online type 2 diabetes risk  
10 calculators. *Patient Educ Couns.* 2019;102(3):467-473. doi:10.1016/j.pec.2018.10.014  
11  
12  
13  
14 26. Lipari M, Berlie H, Saleh Y, Hang P, Moser L. Understandability, actionability, and  
15 readability of online patient education materials about diabetes mellitus. *Am J Heal*  
16  
17  
18  
19  
20  
21  
22 27. Rahn AC, Jull J, Boland L, et al. Guidance and/or Decision Coaching with Patient  
23 Decision Aids: Scoping Reviews to Inform the International Patient Decision Aid  
24 Standards (IPDAS). *Med Decis Mak.* 2021;41(7):938-953.  
25  
26  
27  
28  
29  
30  
31  
32  
33  
34  
35  
36  
37  
38  
39  
40  
41  
42  
43  
44  
45  
46  
47  
48  
49  
50  
51  
52  
53  
54  
55  
56  
57  
58  
59  
60

1  
2  
3 **Declaration of Conflicting Interests**

4 The authors declared no potential conflicts of interest with respect to the research, authorship,  
5 and/or publication of this article.  
6

7  
8 **Funding**

9 The authors disclosed receipt of the following financial support for the research, authorship,  
10 and/or publication of this article: No funding was received to support this study. D Stacey holds  
11 a University of Ottawa research chair in Knowledge Translation to Patients and F Légaré holds a  
12 Canada Research Chair in Shared Decision Making and Knowledge Translation.  
13

14  
15 **Acknowledgments**

16 We would like to acknowledge Dr. Anwar Parbtani, MD, PhD for his support while writing this  
17 study.  
18  
19  
20  
21  
22  
23  
24  
25  
26  
27  
28  
29  
30  
31  
32  
33  
34  
35  
36  
37  
38  
39  
40  
41  
42  
43  
44  
45  
46  
47  
48  
49  
50  
51  
52  
53  
54  
55  
56  
57  
58  
59  
60

Confidential



Figure 1. PRISMA diagram of search results

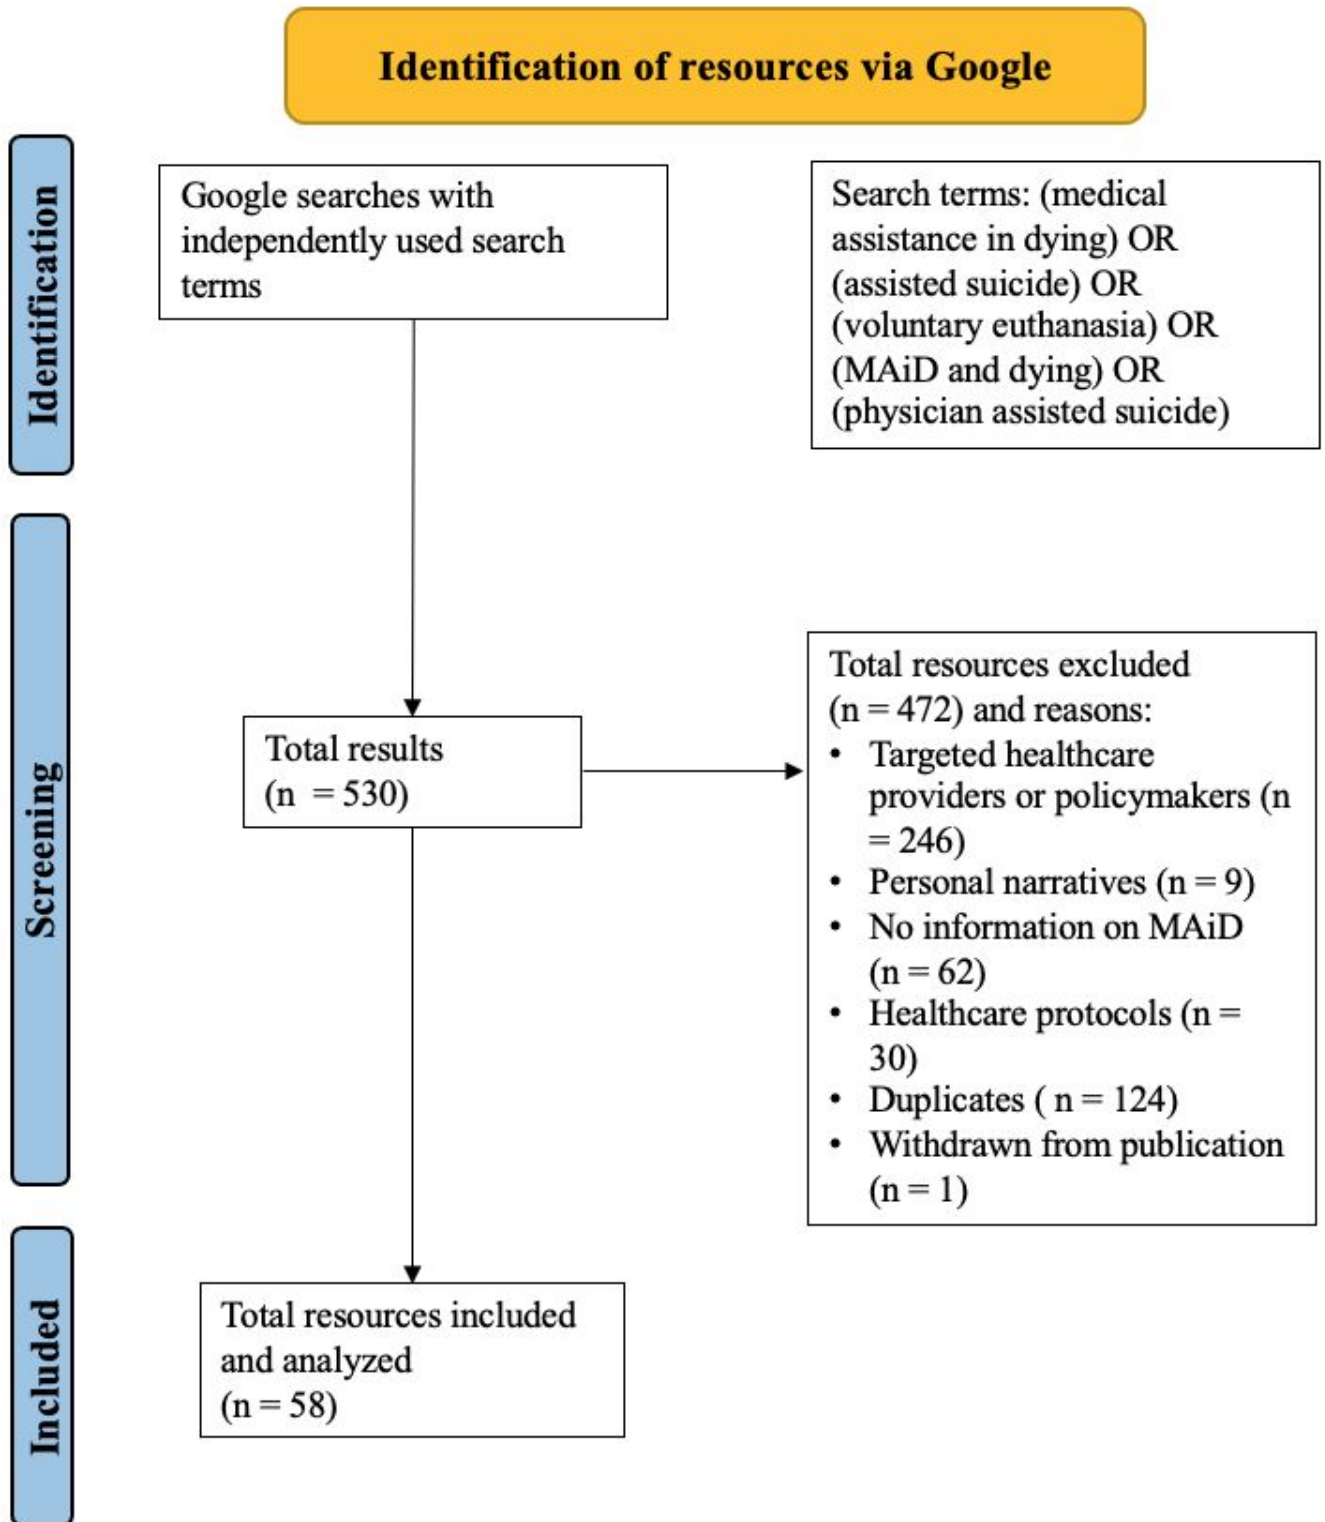

Figure 2. Google Trends of key words graph

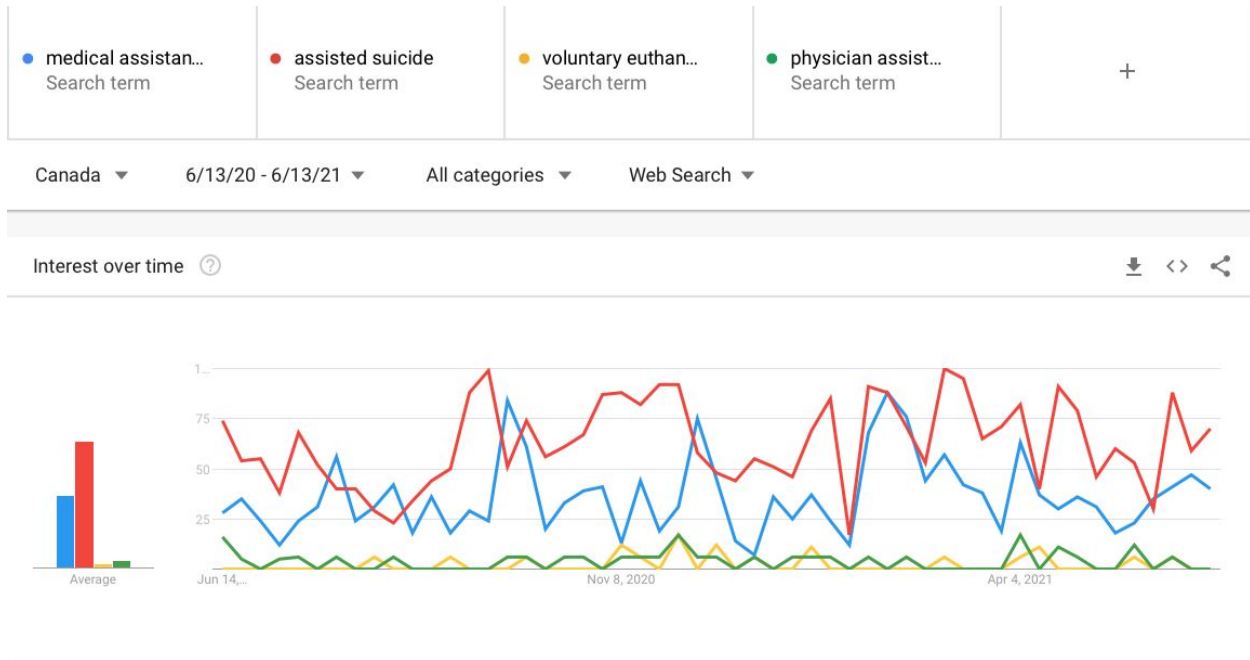

Figure 3. Google Trends of key words diagram

Figure 3a. Google Trends results for key words of subregions 1-5

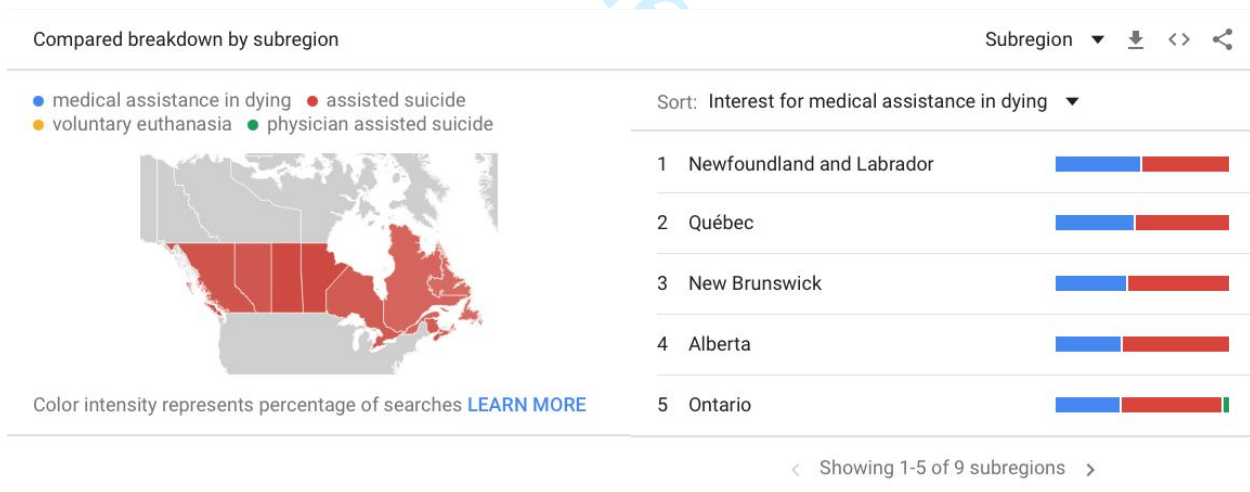

Figure 3b. Google Trends results for key words of subregions 6-9

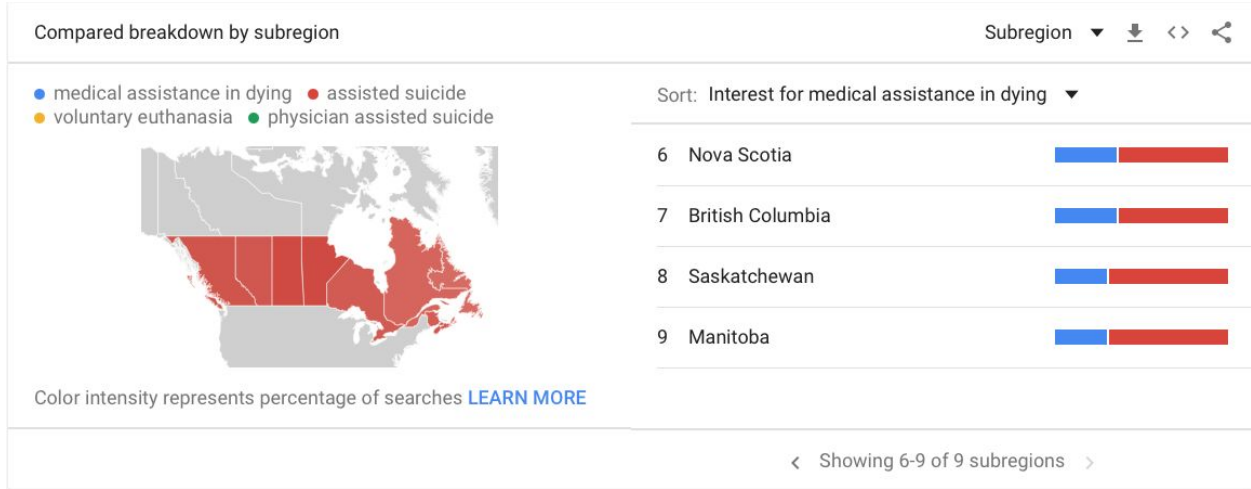

Coloured bars show the prevalence of which search term was used in which subregion.

Figure 4. MAID resources for patients compared to IPDAS defining criteria (n=58)

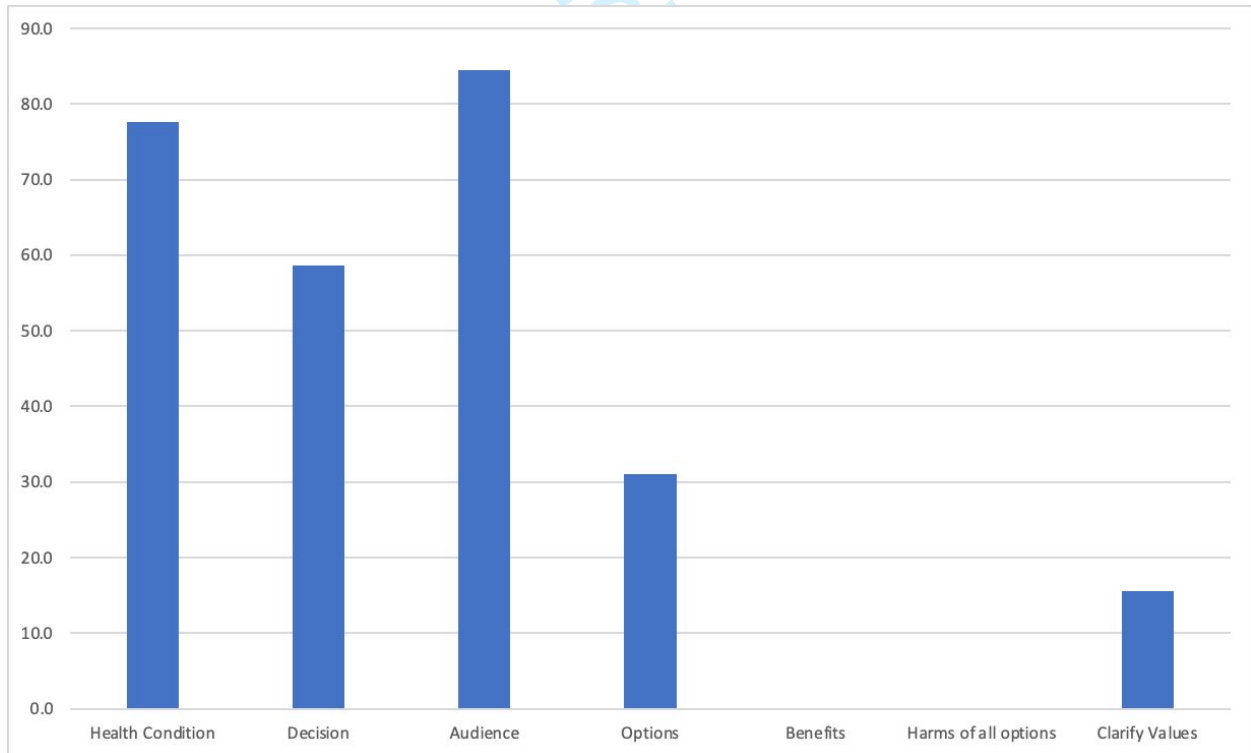

Figure 5. MAID resources for patients PEMAT scores (n=58)

1  
2  
3  
4  
5  
6  
7  
8  
9  
10  
11  
12  
13  
14  
15  
16  
17  
18  
19  
20  
21  
22  
23  
24  
25  
26  
27  
28  
29  
30  
31  
32  
33  
34  
35  
36  
37  
38  
39  
40  
41  
42  
43  
44  
45  
46  
47  
48  
49  
50  
51  
52  
53  
54  
55  
56  
57  
58  
59  
60

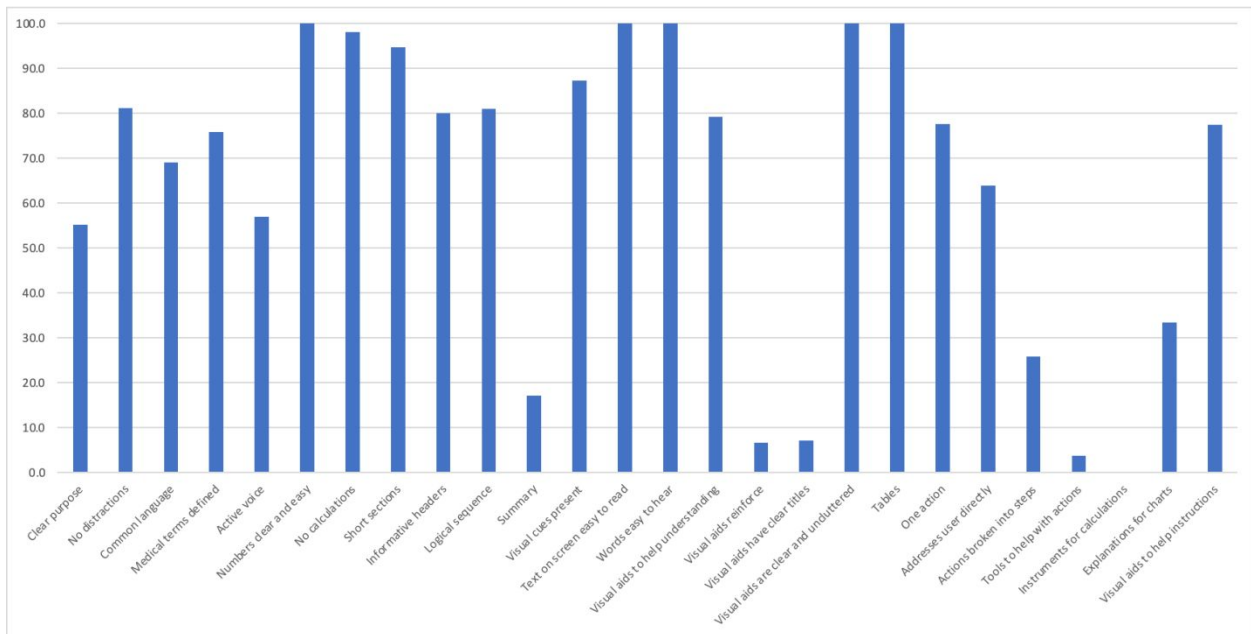

Confidential

Table 1. Main characteristics of publicly available MAID resources

| ID            | Developer                   | Year last updated | Resource name                                                                | Format              | Languages available | Eligibility criteria based on 2021 legislation at 5 mos. | Eligibility criteria based on 2021 legislation at 13 mos. |
|---------------|-----------------------------|-------------------|------------------------------------------------------------------------------|---------------------|---------------------|----------------------------------------------------------|-----------------------------------------------------------|
| <b>Canada</b> |                             |                   |                                                                              |                     |                     |                                                          |                                                           |
| 1             | Government of Canada        | 2021              | <a href="#">MAID</a>                                                         | Webpage             | English, French     | Yes                                                      | Yes                                                       |
| 2             | Government of Canada        | 2021              | <a href="#">Canada's new MAID law</a>                                        | Webpage             | English, French     | Yes                                                      | Yes                                                       |
| 3             | Government of Canada        | 2021              | <a href="#">Canada's New MAID Law (Infographic)</a>                          | Webpage, paper, PDF | English, French     | Yes                                                      | Yes                                                       |
| 4             | Dying with Dignity Canada   | 2021              | <a href="#">Get the Facts: Canada's MAID law</a>                             | Webpage             | English, French     | Yes                                                      | Yes                                                       |
| 5             | Dying with Dignity Canada   | 2021              | <a href="#">A legal overview of MAID</a>                                     | Video               | English             | Yes                                                      | Yes                                                       |
| 6             | Dying with Dignity Canada   | 2021              | <a href="#">From Bill C-14 to Bill C-7: A legal update on MAID in Canada</a> | Video               | English             | Yes                                                      | Yes                                                       |
| 7             | LegalLine                   | NR                | <a href="#">MAID</a>                                                         | Webpage             | English             | Yes                                                      | Yes                                                       |
| 8             | Alzheimer Society of Canada | NR                | <a href="#">MAID</a>                                                         | Webpage             | English, French     | Yes                                                      | Yes                                                       |
| 9             | Canadian Virtual Hospice    | 2019              | <a href="#">How MAID is administered</a>                                     | Video               | English             | No                                                       | No                                                        |

1  
2  
3  
4  
5  
6  
7  
8  
9  
10  
11  
12  
13  
14  
15  
16  
17  
18  
19  
20  
21  
22  
23  
24  
25  
26  
27  
28  
29  
30  
31  
32  
33  
34  
35  
36  
37  
38  
39  
40  
41  
42  
43  
44  
45  
46  
47

|                         |                               |      |                                                                     |                     |                 |     |     |
|-------------------------|-------------------------------|------|---------------------------------------------------------------------|---------------------|-----------------|-----|-----|
| 10                      | CAMAP Canada                  | 2018 | <a href="#">MAID in Canada</a>                                      | Video               | English         | No  | No  |
| 11                      | Canadian Virtual Hospice      | NR   | <a href="#">Explaining MAID</a>                                     | Webpage             | English, French | No  | No  |
| 12                      | Canadian Virtual Hospice      | 2018 | <a href="#">Tara Noble MSW, RSW on explaining MAID to children</a>  | Video               | English         | NA  | NA  |
| 13                      | Centre for Suicide Prevention | NR   | <a href="#">Physician-Assisted Death/MAID and Suicide</a>           | Webpage, paper, PDF | English         | NA  | NA  |
| <b>Alberta</b>          |                               |      |                                                                     |                     |                 |     |     |
| 14                      | Alberta Health Services       | 2021 | <a href="#">MAID: How does Bill C-7 affect me?</a>                  | Webpage, paper, PDF | English         | Yes | Yes |
| 15                      | Alberta Health Services       | 2021 | <a href="#">MAID: How Do I Access MAID Services in Alberta?</a>     | Webpage, paper, PDF | English         | Yes | Yes |
| 16                      | Alberta Health Services       | 2021 | <a href="#">How do I make a formal request for MAID in Alberta?</a> | Webpage, paper, PDF | English         | Yes | Yes |
| 17                      | Alberta Health Services       | NR   | <a href="#">Patients or Family Members: MAID</a>                    | Webpage             | English         | Yes | Yes |
| 18                      | Alberta Health Services       | 2017 | <a href="#">MAID: Getting More Information</a>                      | Webpage, paper, PDF | English         | No  | No  |
| <b>British Columbia</b> |                               |      |                                                                     |                     |                 |     |     |
| 19                      | Fraser Health                 | 2021 | <a href="#">MAID fact sheet</a>                                     | Webpage, paper, PDF | English         | Yes | Yes |
| 20                      | Fraser Health                 | 2021 | <a href="#">MAID</a>                                                | Webpage, paper, PDF | English         | Yes | Yes |
| 21                      | Fraser Health                 | NR   | <a href="#">MAID</a>                                                | Webpage             | English         | Yes | Yes |

|    |                                |      |                                                                                                  |                     |                                                                                |     |     |
|----|--------------------------------|------|--------------------------------------------------------------------------------------------------|---------------------|--------------------------------------------------------------------------------|-----|-----|
| 22 | BC Cancer                      | NR   | <a href="#">MAID</a>                                                                             | Webpage             | English                                                                        | No  | Yes |
| 23 | BC Cancer                      | 2017 | <a href="#">MAID: Q &amp; A Information for patients of Provincial Health Services Authority</a> | Webpage, paper, PDF | English                                                                        | No  | No  |
| 24 | Government of British Columbia | 2021 | <a href="#">MAID</a>                                                                             | Webpage             | English                                                                        | Yes | Yes |
| 25 | Island Health                  | 2021 | <a href="#">MAID Information for Island Health patients and families</a>                         | Webpage, paper, PDF | English                                                                        | Yes | Yes |
| 26 | Island Health                  | 2021 | <a href="#">MAID; A Guide to Support Patients &amp; Families</a>                                 | Webpage, paper, PDF | English                                                                        | Yes | Yes |
| 27 | Interior Health Authority      | 2021 | <a href="#">A Shared Journey: A Resource for Individuals, Families and Loved Ones about MAID</a> | Webpage, paper, PDF | English                                                                        | Yes | Yes |
| 28 | Fraser Health                  | 2021 | <a href="#">A Guide to Support People Requesting MAID</a>                                        | Webpage, paper, PDF | English                                                                        | Yes | Yes |
| 29 | Vancouver Coastal Health       | 2021 | <a href="#">MAID patient pamphlet</a>                                                            | Webpage, paper, PDF | English, Chinese Traditional, Chinese Simplified, Punjabi, Spanish, Vietnamese | Yes | Yes |
| 30 | Island Health                  | NR   | <a href="#">MAID</a>                                                                             | Webpage             | English                                                                        | Yes | Yes |
| 31 | Interior Health Authority      | 2019 | <a href="#">MAID pamphlet for individuals and families</a>                                       | Webpage, paper, PDF | English                                                                        | No  | Yes |
| 32 | Vancouver Coastal Health       | NR   | <a href="#">MAID frequently asked questions</a>                                                  | Webpage             | English                                                                        | No  | Yes |

1  
2  
3  
4  
5  
6  
7  
8  
9  
10  
11  
12  
13  
14  
15  
16  
17  
18  
19  
20  
21  
22  
23  
24  
25  
26  
27  
28  
29  
30  
31  
32  
33  
34  
35  
36  
37  
38  
39  
40  
41  
42  
43  
44  
45  
46  
47

| <b>Saskatchewan</b> |                               |      |                                                                                                                    |                     |                 |     |     |
|---------------------|-------------------------------|------|--------------------------------------------------------------------------------------------------------------------|---------------------|-----------------|-----|-----|
| 33                  | Saskatchewan Health Authority | 2021 | <a href="#">Provincial MAID Program Frequently Asked Questions for Patients and Families Foreseeable Death</a>     | Webpage, paper, PDF | English         | Yes | Yes |
| 34                  | Saskatchewan Health Authority | 2021 | <a href="#">Provincial MAID Program Frequently Asked Questions for Patients and Families Non-Foreseeable Death</a> | Webpage, paper, PDF | English         | Yes | Yes |
| 35                  | Government of Saskatchewan    | NR   | <a href="#">MAID Information for the Public</a>                                                                    | Webpage             | English         | Yes | Yes |
| 36                  | Saskatchewan Health Authority | 2021 | <a href="#">Provincial MAID Program; Information for Patients and Families</a>                                     | Webpage, paper, PDF | English         | NA  | NA  |
| 37                  | Saskatchewan Health Authority | 2021 | <a href="#">Provincial MAID Program; Preparing for Provision Day</a>                                               | Webpage, paper, PDF | English         | NA  | NA  |
| <b>Manitoba</b>     |                               |      |                                                                                                                    |                     |                 |     |     |
| 38                  | Shared Health Manitoba        | 2021 | <a href="#">MAID in Manitoba</a>                                                                                   | Webpage, paper, PDF | English         | Yes | Yes |
| 39                  | Government of Manitoba        | NR   | <a href="#">Questions and answers about MAID</a>                                                                   | Webpage             | English, French | No  | No  |
| <b>Ontario</b>      |                               |      |                                                                                                                    |                     |                 |     |     |
| 40                  | Government of Ontario         | NR   | <a href="#">MAID: Information for Patients</a>                                                                     | Webpage, paper, PDF | English, French | Yes | Yes |
| 41                  | University Health Network     | NR   | <a href="#">MAID</a>                                                                                               | Webpage             | English         | No  | No  |



|                          |                                                            |      |                                                                            |                     |                 |     |     |
|--------------------------|------------------------------------------------------------|------|----------------------------------------------------------------------------|---------------------|-----------------|-----|-----|
| 42                       | Government of Ontario                                      | 2021 | <a href="#">MAID and end-of-life decisions</a>                             | Webpage             | English, French | Yes | Yes |
| 43                       | Ontario Ministry of Health                                 | 2021 | <a href="#">MAID</a>                                                       | Webpage             | English, French | Yes | Yes |
| 44                       | The Ottawa Hospital                                        | 2021 | <a href="#">MAID: Information for patients and families</a>                | Webpage, paper, PDF | English, French | Yes | Yes |
| 45                       | The Ottawa Hospital                                        | 2021 | <a href="#">MAID: Information for patients and loved ones</a>              | Webpage             | English, French | Yes | Yes |
| 46                       | Waterloo Wellington Integrated Hospice Palliative Medicine | 2017 | <a href="#">Waterloo Wellington MAID Frequently Asked Questions (FAQs)</a> | Webpage, paper, PDF | English         | No  | No  |
| 47                       | Home and Community Care Support Services South West        | NR   | <a href="#">MAID</a>                                                       | Webpage             | English         | No  | No  |
| <b>Québec</b>            |                                                            |      |                                                                            |                     |                 |     |     |
| 48                       | Government of Québec                                       | 2020 | <a href="#">MAID</a>                                                       | Webpage             | English, French | No  | Yes |
| <b>Eastern Provinces</b> |                                                            |      |                                                                            |                     |                 |     |     |
| 49                       | Nova Scotia Health Authority                               | 2021 | <a href="#">Patient &amp; Family Guide: MAID Patient and Family Guide</a>  | Webpage, paper, PDF | English, French | Yes | Yes |
| 50                       | Horizon Health Network, New Brunswick                      | NR   | <a href="#">Patient Information: MAID</a>                                  | Webpage, paper, PDF | English         | Yes | Yes |

1  
2  
3  
4  
5  
6  
7  
8  
9  
10  
11  
12  
13  
14  
15  
16  
17  
18  
19  
20  
21  
22  
23  
24  
25  
26  
27  
28  
29  
30  
31  
32  
33  
34  
35  
36  
37  
38  
39  
40  
41  
42  
43  
44  
45  
46  
47

|                             |                                         |      |                                                                       |                     |                 |     |     |
|-----------------------------|-----------------------------------------|------|-----------------------------------------------------------------------|---------------------|-----------------|-----|-----|
| 51                          | Government of New Brunswick             | NR   | <a href="#">MAID</a>                                                  | Webpage             | English, French | No  | No  |
| 52                          | Government of Newfoundland and Labrador | NR   | <a href="#">MAID frequently asked questions</a>                       | Webpage, paper, PDF | English, French | No  | No  |
| 53                          | Government of Prince Edward Island      | 2021 | <a href="#">MAID</a>                                                  | Webpage             | English, French | No  | No  |
| 54                          | Nova Scotia Health Authority            | NR   | <a href="#">MAID</a>                                                  | Webpage             | English, French | No  | No  |
| <b>Canadian Territories</b> |                                         |      |                                                                       |                     |                 |     |     |
| 55                          | Government of Northwest Territories     | 2021 | <a href="#">MAID– Information for Patients and Families</a>           | Webpage, paper, PDF | English, French | Yes | Yes |
| 56                          | Government of Northwest Territories     | 2021 | <a href="#">MAID– Questions and Answers for Patients and Families</a> | Webpage, paper, PDF | English, French | Yes | Yes |
| 57                          | Government of Northwest Territories     | NR   | <a href="#">MAID</a>                                                  | Webpage             | English, French | Yes | Yes |
| 58                          | Government of Yukon                     | NR   | <a href="#">Find information about MAID</a>                           | Webpage             | English, French | Yes | Yes |

NR= not reported; NA= not applicable; *shaded results indicate adequate scores for understandability and actionability*

Table 2. Appraisal results using IPDAS defining criteria and PEMAT scores

| Resource ID | IPDAS                      |                     |                 |                            |                         |                      |                               | PEMAT      |                       |                   |
|-------------|----------------------------|---------------------|-----------------|----------------------------|-------------------------|----------------------|-------------------------------|------------|-----------------------|-------------------|
|             | Describes health condition | Decision to be made | Target audience | List all available options | Benefits of all options | Harms of all options | Explicit values clarification | Total (/7) | Understandability (%) | Actionability (%) |
| 1           | √                          | √                   | √               | √                          |                         |                      |                               | 4          | 75                    | 60                |
| 2           | √                          |                     |                 | √                          |                         |                      |                               | 2          | 67                    | 20                |
| 3           | √                          |                     |                 |                            |                         |                      |                               | 1          | 54                    | 33                |
| 4           | √                          | √                   | √               |                            |                         |                      |                               | 3          | 67                    | 20                |
| 5           | √                          | √                   | √               |                            |                         |                      |                               | 3          | 64                    | 0                 |
| 6           | √                          | √                   | √               |                            |                         |                      |                               | 3          | 73                    | 0                 |
| 7           | √                          | √                   | √               | √                          |                         |                      |                               | 4          | 67                    | 40                |
| 8           | √                          |                     |                 |                            |                         |                      |                               | 1          | 54                    | 40                |
| 9           | √                          |                     |                 |                            |                         |                      | √                             | 2          | 56                    | 0                 |
| 10          | √                          | √                   | √               |                            |                         |                      | √                             | 4          | 70                    | 67                |
| 11          | √                          | √                   | √               |                            |                         |                      |                               | 3          | 69                    | 40                |
| 12          |                            |                     |                 |                            |                         |                      |                               | 0          | 50                    | 0                 |
| 13          | √                          | √                   |                 |                            |                         |                      |                               | 2          | 50                    | 0                 |
| 14          |                            |                     | √               |                            |                         |                      |                               | 1          | 70                    | 80                |

1  
2  
3  
4  
5  
6  
7  
8  
9  
10  
11  
12  
13  
14  
15  
16  
17  
18  
19  
20  
21  
22  
23  
24  
25  
26  
27  
28  
29  
30  
31  
32  
33  
34  
35  
36  
37  
38  
39  
40  
41  
42  
43  
44  
45  
46  
47

|    |   |   |   |   |  |  |   |   |    |    |
|----|---|---|---|---|--|--|---|---|----|----|
| 15 |   |   | √ |   |  |  |   | 1 | 91 | 60 |
| 16 |   |   | √ |   |  |  |   | 1 | 69 | 60 |
| 17 |   |   | √ |   |  |  |   | 1 | 67 | 40 |
| 18 | √ |   | √ | √ |  |  |   | 3 | 60 | 40 |
| 19 | √ | √ | √ |   |  |  |   | 3 | 92 | 80 |
| 20 |   |   | √ |   |  |  |   | 1 | 83 | 86 |
| 21 | √ | √ | √ |   |  |  |   | 3 | 83 | 80 |
| 22 | √ | √ | √ | √ |  |  |   | 4 | 83 | 80 |
| 23 | √ |   | √ | √ |  |  |   | 3 | 85 | 80 |
| 24 | √ | √ | √ |   |  |  |   | 3 | 67 | 60 |
| 25 | √ | √ | √ | √ |  |  |   | 4 | 60 | 40 |
| 26 |   |   | √ |   |  |  | √ | 2 | 63 | 40 |
| 27 | √ | √ | √ |   |  |  | √ | 4 | 67 | 40 |
| 28 |   |   | √ |   |  |  | √ | 2 | 69 | 40 |
| 29 | √ | √ | √ | √ |  |  |   | 4 | 67 | 60 |
| 30 | √ |   | √ |   |  |  |   | 2 | 60 | 80 |
| 31 | √ | √ | √ |   |  |  |   | 3 | 60 | 60 |
| 32 | √ | √ | √ | √ |  |  | √ | 5 | 75 | 60 |
| 33 | √ | √ | √ | √ |  |  |   | 4 | 83 | 20 |

Confidential

|    |   |   |   |   |  |  |   |   |    |    |
|----|---|---|---|---|--|--|---|---|----|----|
| 34 | √ | √ | √ |   |  |  |   | 3 | 85 | 20 |
| 35 | √ | √ | √ |   |  |  |   | 3 | 63 | 40 |
| 36 |   | √ | √ |   |  |  |   | 2 | 83 | 60 |
| 37 |   |   | √ |   |  |  | √ | 2 | 92 | 60 |
| 38 |   |   |   |   |  |  |   | 0 | 78 | 60 |
| 39 | √ | √ | √ |   |  |  |   | 3 | 75 | 60 |
| 40 | √ | √ | √ | √ |  |  |   | 4 | 75 | 80 |
| 41 | √ | √ | √ |   |  |  | √ | 4 | 83 | 80 |
| 42 | √ | √ | √ | √ |  |  |   | 4 | 92 | 60 |
| 43 | √ |   | √ |   |  |  |   | 2 | 69 | 17 |
| 44 | √ | √ | √ | √ |  |  |   | 4 | 84 | 60 |
| 45 | √ |   | √ |   |  |  |   | 2 | 82 | 60 |
| 46 | √ | √ | √ |   |  |  |   | 3 | 92 | 60 |
| 47 |   |   | √ |   |  |  |   | 1 | 50 | 20 |
| 48 | √ |   |   |   |  |  |   | 1 | 50 | 20 |
| 49 | √ | √ | √ |   |  |  | √ | 4 | 92 | 80 |
| 50 | √ | √ | √ | √ |  |  |   | 4 | 69 | 60 |
| 51 | √ |   | √ |   |  |  |   | 2 | 47 | 20 |
| 52 | √ | √ | √ | √ |  |  |   | 4 | 53 | 40 |

1  
2  
3  
4  
5  
6  
7  
8  
9  
10  
11  
12  
13  
14  
15  
16  
17  
18  
19  
20  
21  
22  
23  
24  
25  
26  
27  
28  
29  
30  
31  
32  
33  
34  
35  
36  
37  
38  
39  
40  
41  
42  
43  
44  
45  
46  
47

|       |     |     |     |     |    |    |     |   |           |           |
|-------|-----|-----|-----|-----|----|----|-----|---|-----------|-----------|
| 53    | √   | √   | √   | √   |    |    |     | 4 | 83        | 20        |
| 54    | √   | √   |     |     |    |    |     | 2 | 82        | 60        |
| 55    | √   | √   | √   | √   |    |    |     | 4 | <b>92</b> | <b>80</b> |
| 56    | √   | √   | √   | √   |    |    |     | 4 | 83        | 60        |
| 57    |     |     | √   |     |    |    |     | 1 | 91        | 60        |
| 58    | √   |     | √   |     |    |    |     | 2 | 100       | 60        |
| TOTAL | 77% | 59% | 84% | 31% | 0% | 0% | 16% | 3 | 70%       | 60%       |

\* Legend: “√” = present, “ ” = not present; light shaded results indicate adequate scores for understandability or actionability;  
 bolded and dark shaded results indicate adequate scores for both understandability and actionability
